# Supplementary material for: Decoding the Proanthocyanins Profile of Italian Red Wines
Source: MDPI journal article supplement (doi:10.3390/beverages8040076), 2022-11-25
Supplement: s1 [file s1]

# Decoding the Proanthocyanins Profile of Italian Red Wines

Panagiotis Arapitsas <sup>1,2,\*</sup>, Daniele Perenzoni <sup>1</sup>, Maurizio Ugliano <sup>3</sup>, Davide Slaghenaufi <sup>3</sup>, Simone Giacosa <sup>4</sup>, Maria Alessandra Paisonni <sup>4</sup>, Paola Piombino <sup>5</sup>, Elisabetta Pittari <sup>5</sup>, Andrea Versari <sup>6</sup>, Arianna Ricci <sup>6</sup>, Andrea Curioni <sup>7</sup>, Matteo Marangon <sup>7</sup> and Fulvio Mattivi <sup>1</sup>

1 Unit of Metabolomics, Research and Innovation Centre, Fondazione Edmund Mach, 38010 San Michele all'Adige, Italy

2 Department of Wine, Vine and Beverage Sciences, School of Food Science, University of West Attica, Egaleo, 12243 Athens, Greece

3 Department of Biotechnology, University of Verona, 37134 Verona, Italy

4 Department of Agricultural, Forest and Food Sciences, University of Torino, 10095 Grugliasco, Italy

5 Department of Agricultural Sciences, Division of Vine and Wine Sciences, University of Napoli Federico II, 83100 Avellino, Italy

6 Department of Agricultural and Food Sciences, University of Bologna, 47521 Cesena, Italy

7 Department of Agronomy, Food, Natural Resources, Animals and Environment (DAFNAE), University of Padova, 35020 Legnaro, Italy

\* Correspondence: panagiotis.arapitsas@fmach.it or parapitsas@uniwa.gr

## Supplementary Materials

**Table S1.** Basic statistics and Anova analysis of the dimeric procyanidins

**Table S2.** Basic statistics and Anova analysis of the free monomers' absolute values

**Table S3.** Basic statistics and Anova analysis of the free monomers' % values

**Table S4.** Basic statistics and Anova analysis of the free terminal units' absolute values

**Table S5.** Basic statistics and Anova analysis of the free terminal units' % values

**Table S6.** Basic statistics and Anova analysis of the free upper units' absolute values

**Table S7.** Basic statistics and Anova analysis of the free upper units' % values

**Formulas for the calculations**

**Table S1.** Basic statistics and Anova analysis of the dimeric procyanidins

| Group (Cultivar)          | Number of samples per group | procyanidin B1 |   |                |           | procyanidin B2 |   |                |       |
|---------------------------|-----------------------------|----------------|---|----------------|-----------|----------------|---|----------------|-------|
|                           |                             | mg/L           | ± | Std. Deviation | Anova     | mg/L           | ± | Std. Deviation | Anova |
| <b>Sangiovese Romagna</b> | 7                           | 26.09          | ± | 5.83           | a,b       | 23.77          | ± | 8.73           | a,b   |
| <b>Sangiovese Tuscany</b> | 12                          | 22.54          | ± | 8.22           | a         | 22.59          | ± | 5.91           | a,b   |
| <b>Nebbiolo</b>           | 11                          | 39.69          | ± | 11.14          | a,b,c,d,e | 34.18          | ± | 15.51          | b,c   |
| <b>Aglianico</b>          | 10                          | 47.97          | ± | 9.39           | d,e       | 49.68          | ± | 25.35          | c     |
| <b>Nerello Mascalese</b>  | 3                           | 30.31          | ± | 12.87          | a,b,c,d   | 11.54          | ± | 5.07           | a     |
| <b>Primitivo</b>          | 11                          | 28.39          | ± | 9.45           | a,b,c     | 26.41          | ± | 8.95           | a,b   |
| <b>Raboso Piave</b>       | 10                          | 40.18          | ± | 14.52          | b,c,d,e   | 13.47          | ± | 4.35           | a     |
| <b>Canonnau</b>           | 9                           | 29.10          | ± | 12.97          | a,b,c     | 16.44          | ± | 7.94           | a,b   |
| <b>Teroldego</b>          | 11                          | 23.54          | ± | 10.60          | a,b       | 24.54          | ± | 12.75          | a,b   |
| <b>Sagrantino</b>         | 10                          | 44.67          | ± | 14.85          | c,d,e     | 30.41          | ± | 7.59           | a,b,c |
| <b>Montepulciano</b>      | 9                           | 29.89          | ± | 10.20          | a,b,c,d   | 22.59          | ± | 9.88           | a,b   |
| <b>Corvina</b>            | 7                           | 50.07          | ± | 10.84          | e         | 22.68          | ± | 11.53          | a,b   |
| <b>Total</b>              | 111                         | 34.34          | ± | 14.13          |           | 25.87          | ± | 14.86          |       |

Anova: Means that do not share a letter are significantly different (significance value below 0.05)

**Table S2.** Basic statistics and Anova analysis of the free monomers' absolute values

| Group (Cultivar)   | Number of samples per group | catechin free |                |       | epicatechin free |                |       | galocatechin free |                |       | epigallocatechin free |                |       | catechin gallate free |                |       | Total monomers (mg/L) |                |            |
|--------------------|-----------------------------|---------------|----------------|-------|------------------|----------------|-------|-------------------|----------------|-------|-----------------------|----------------|-------|-----------------------|----------------|-------|-----------------------|----------------|------------|
|                    |                             | mg/L          | Std. Deviation | Anova | mg/L             | Std. Deviation | Anova | mg/L              | Std. Deviation | Anova | mg/L                  | Std. Deviation | Anova | mg/L                  | Std. Deviation | Anova | mg/L                  | Std. Deviation | Anova      |
| Sangiovese Romagna | 7                           | 15.60         | ± 2.95         | a     | 15.55            | ± 3.48         | a,b   | 0.38              | ± 0.18         | a,b   | 2.04                  | ± 0.51         | a,b,c | 0.02                  | ± 0.01         | a     | 33.58                 | ± 6.15         | a,b        |
| Sangiovese Tuscany | 12                          | 16.75         | ± 4.31         | a     | 15.92            | ± 2.91         | a,b   | 0.31              | ± 0.12         | a,b   | 2.04                  | ± 0.23         | a,b,c | 0.05                  | ± 0.05         | a     | 35.07                 | ± 6.16         | a,b        |
| Nebbiolo           | 11                          | 28.81         | ± 7.97         | c,d   | 18.15            | ± 6.45         | a,b   | 0.20              | ± 0.15         | a,b   | 1.14                  | ± 0.35         | a     | 0.23                  | ± 0.25         | b     | 48.53                 | ± 13.57        | a,b        |
| Aglianico          | 10                          | 35.34         | ± 9.50         | d     | 35.37            | ± 13.16        | c     | 0.25              | ± 0.33         | a,b   | 1.60                  | ± 0.56         | a,b,c | 0.10                  | ± 0.10         | a,b   | 72.65                 | ± 19.60        | c          |
| Nerello Mascalese  | 3                           | 27.34         | ± 2.05         | b,c,d | 9.11             | ± 2.68         | a     | 0.89              | ± 0.47         | c     | 2.29                  | ± 0.65         | b,c   | 0.03                  | ± 0.00         | a     | 39.66                 | ± 0.55         | a,b        |
| Primitivo          | 11                          | 19.32         | ± 4.40         | a,b,c | 18.16            | ± 3.78         | a,b   | 0.10              | ± 0.03         | a     | 1.05                  | ± 0.36         | a     | 0.07                  | ± 0.09         | a     | 38.70                 | ± 7.90         | a,b        |
| Raboso Piave       | 10                          | 19.06         | ± 4.65         | a,b,c | 9.15             | ± 3.32         | a     | 0.34              | ± 0.18         | a,b   | 1.75                  | ± 0.60         | a,b,c | 0.04                  | ± 0.02         | a     | 30.34                 | ± 7.89         | a,b        |
| Canonnau           | 9                           | 17.54         | ± 2.66         | a,b   | 10.48            | ± 2.36         | a     | 0.35              | ± 0.22         | a,b   | 1.12                  | ± 0.30         | a     | 0.04                  | ± 0.02         | a     | 29.52                 | ± 4.21         | a          |
| Teroldego          | 11                          | 23.21         | ± 8.69         | a,b,c | 20.71            | ± 7.90         | b     | 0.21              | ± 0.09         | a,b   | 4.80                  | ± 1.23         | d     | 0.03                  | ± 0.01         | a     | 48.95                 | ± 16.45        | b          |
| Sagrantino         | 10                          | 24.03         | ± 8.01         | a,b,c | 22.15            | ± 6.27         | b     | 0.15              | ± 0.05         | a     | 1.73                  | ± 0.56         | a,b,c | 0.04                  | ± 0.02         | a     | 48.10                 | ± 13.68        | a,b        |
| Montepulciano      | 9                           | 18.41         | ± 4.53         | a,b,c | 16.52            | ± 2.46         | a,b   | 0.37              | ± 0.19         | a,b   | 2.48                  | ± 0.83         | c     | 0.04                  | ± 0.03         | a     | 37.82                 | ± 6.49         | a,b        |
| Corvina            | 7                           | 27.36         | ± 6.93         | b,c,d | 15.76            | ± 5.48         | a,b   | 0.46              | ± 0.17         | b     | 1.45                  | ± 0.45         | a,b   | 0.03                  | ± 0.00         | a     | 45.05                 | ± 12.43        | a,b        |
| <b>Total</b>       | <b>111</b>                  | <b>22.47</b>  | <b>± 8.33</b>  |       | <b>17.87</b>     | <b>± 8.88</b>  |       | <b>0.29</b>       | <b>± 0.22</b>  |       | <b>1.96</b>           | <b>± 1.19</b>  |       | <b>0.06</b>           | <b>± 0.10</b>  |       | <b>42.65</b>          | <b>± 15.97</b> | <b>a,b</b> |

Anova: Means that do not share a letter are significantly different (significance value below 0.05)

**Table S3.** Basic statistics and Anova analysis of the free monomers' % values

| Group (Cultivar)   | Number of samples per group | catechin free %     |                |                     | epicatechin free % |                    |       | gallo catechin free % |                |                    | epigallocatechin free % |                |       | catechin gallate free % |                |       |
|--------------------|-----------------------------|---------------------|----------------|---------------------|--------------------|--------------------|-------|-----------------------|----------------|--------------------|-------------------------|----------------|-------|-------------------------|----------------|-------|
|                    |                             | free monomers %     | Std. Deviation | Anova               | free monomers %    | Std. Deviation     | Anova | free monomers %       | Std. Deviation | Anova              | free monomers %         | Std. Deviation | Anova | free monomers %         | Std. Deviation | Anova |
| Sangiovese Romagna | 7                           | 46.45 ± 3.24        | a              | 46.17 ± 4.51        | e                  | 1.13 ± 0.53        | a,b,c | 6.18 ± 1.71           | b,c            | 0.07 ± 0.05        | a                       |                |       |                         |                |       |
| Sangiovese Tuscany | 12                          | 47.31 ± 6.24        | a              | 45.72 ± 6.07        | e                  | 0.90 ± 0.34        | b,c   | 5.92 ± 0.82           | b,c            | 0.16 ± 0.17        | a                       |                |       |                         |                |       |
| Nebbiolo           | 11                          | 59.95 ± 6.08        | b              | 36.56 ± 6.48        | b,c,d              | 0.48 ± 0.50        | a,b,c | 2.45 ± 0.94           | a              | 0.55 ± 0.54        | b                       |                |       |                         |                |       |
| Aglianico          | 10                          | 49.16 ± 6.69        | a              | 47.88 ± 7.45        | e                  | 0.42 ± 0.65        | a,b,c | 2.39 ± 1.15           | a              | 0.15 ± 0.17        | a                       |                |       |                         |                |       |
| Nerello Mascalese  | 3                           | 68.98 ± 6.01        | c              | 22.93 ± 6.60        | a                  | 2.25 ± 1.21        | e     | 5.76 ± 1.56           | b,c            | 0.07 ± 0.00        | a                       |                |       |                         |                |       |
| Primitivo          | 11                          | 49.69 ± 3.08        | a              | 47.05 ± 3.17        | e                  | 0.27 ± 0.10        | a     | 2.76 ± 0.85           | a              | 0.24 ± 0.44        | a,b                     |                |       |                         |                |       |
| Raboso Piave       | 10                          | 63.34 ± 4.01        | b,c            | 29.65 ± 4.11        | a,b                | 1.10 ± 0.50        | b,c   | 5.76 ± 1.15           | b,c            | 0.14 ± 0.07        | a                       |                |       |                         |                |       |
| Canonnau           | 9                           | 59.59 ± 4.71        | b              | 35.30 ± 5.21        | b,c                | 1.20 ± 0.80        | c     | 3.79 ± 0.89           | a,b            | 0.12 ± 0.04        | a                       |                |       |                         |                |       |
| Teroldego          | 11                          | 47.04 ± 4.79        | a              | 41.93 ± 4.44        | c,d,e              | 0.44 ± 0.19        | a,b,c | 10.53 ± 3.76          | e              | 0.06 ± 0.03        | a                       |                |       |                         |                |       |
| Sagrantino         | 10                          | 49.71 ± 6.38        | a              | 46.06 ± 6.98        | e                  | 0.36 ± 0.20        | a,b   | 3.77 ± 1.20           | a,b            | 0.10 ± 0.10        | a                       |                |       |                         |                |       |
| Montepulciano      | 9                           | 48.21 ± 5.30        | a              | 44.15 ± 5.33        | d,e                | 0.94 ± 0.40        | a,b,c | 6.59 ± 1.92           | c              | 0.11 ± 0.10        | a                       |                |       |                         |                |       |
| Corvina            | 7                           | 61.30 ± 3.55        | b              | 34.30 ± 4.40        | b,c                | 1.07 ± 0.44        | b,c   | 3.25 ± 0.92           | a              | 0.08 ± 0.04        | a                       |                |       |                         |                |       |
| <b>Total</b>       | <b>111</b>                  | <b>53.22 ± 8.34</b> |                | <b>40.93 ± 8.46</b> |                    | <b>0.76 ± 0.62</b> |       | <b>4.92 ± 2.85</b>    |                | <b>0.17 ± 0.27</b> |                         |                |       |                         |                |       |

Anova: Means that do not share a letter are significantly different (significance value below 0.05)

**Table S4.** Basic statistics and Anova analysis of the terminal units' absolute values

| Group (Cultivar)   | Number of samples per group | catechin terminal    |                |                      | epicatechin terminal |                     |         | galocatechin terminal |                |                    | epigallocatechin terminal |                       |       | catechin gallate terminal |                |       | total terminal units |                |       |
|--------------------|-----------------------------|----------------------|----------------|----------------------|----------------------|---------------------|---------|-----------------------|----------------|--------------------|---------------------------|-----------------------|-------|---------------------------|----------------|-------|----------------------|----------------|-------|
|                    |                             | mg/L                 | Std. Deviation | Anova                | mg/L                 | Std. Deviation      | Anova   | mg/L                  | Std. Deviation | Anova              | mg/L                      | Std. Deviation        | Anova | mg/L                      | Std. Deviation | Anova | mg/L                 | Std. Deviation | Anova |
|                    |                             | Sangiovese Romagna   | 7              | 40.02 ± 11.12        | a,b,c                | 28.55 ± 14.12       | a,b,c,d | 11.86 ± 2.70          | d,e            | 2.59 ± 0.96        | b,c,d                     | 0.19 ± 0.06           | a,b   | 83.21 ± 27.07             | a,b,c          |       |                      |                |       |
| Sangiovese Tuscany | 12                          | 48.33 ± 12.69        | a,b,c          | 29.08 ± 7.84         | a,b,c,d              | 12.25 ± 3.47        | d,e     | 2.49 ± 0.73           | b,c,d          | 0.19 ± 0.08        | a,b                       | 92.35 ± 21.06         | a,b,c |                           |                |       |                      |                |       |
| Nebbiolo           | 11                          | 72.66 ± 25.65        | c              | 34.91 ± 18.49        | b,c,d                | 12.17 ± 3.45        | d,e     | 1.81 ± 0.76           | a,b,c          | 0.25 ± 0.20        | a                         | 121.80 ± 45.79        | b,c   |                           |                |       |                      |                |       |
| Aglianico          | 10                          | 72.79 ± 26.31        | c              | 49.45 ± 16.01        | d                    | 5.75 ± 2.40         | a,b,c   | 2.57 ± 1.36           | b,c,d          | 0.19 ± 0.11        | a,b                       | 130.76 ± 42.41        | c,d   |                           |                |       |                      |                |       |
| Nerello Mascalese  | 3                           | 57.11 ± 17.04        | a,b,c          | 17.06 ± 10.80        | a,b                  | 20.16 ± 2.30        | f       | 2.82 ± 0.49           | c,d            | 0.15 ± 0.01        | a,b                       | 97.30 ± 26.11         | a,b,c |                           |                |       |                      |                |       |
| Primitivo          | 11                          | 66.84 ± 12.64        | b,c            | 46.17 ± 12.00        | c,d                  | 5.05 ± 1.31         | a,b     | 1.97 ± 1.33           | a,b,c          | 0.17 ± 0.09        | a,b                       | 120.21 ± 25.11        | b,c   |                           |                |       |                      |                |       |
| Raboso Piave       | 10                          | 66.84 ± 31.15        | b,c            | 21.00 ± 16.39        | a,b                  | 12.31 ± 5.54        | c,d,e   | 2.53 ± 1.70           | b,c,d          | 0.19 ± 0.07        | a,b                       | 101.71 ± 53.16        | a,b,c |                           |                |       |                      |                |       |
| Canonnau           | 9                           | 50.21 ± 23.30        | a,b,c          | 15.29 ± 7.07         | a,b                  | 10.43 ± 4.08        | b,c,d   | 1.41 ± 0.53           | a,b,c          | 0.16 ± 0.04        | a,b                       | 77.49 ± 33.51         | a,b,c |                           |                |       |                      |                |       |
| Teroldego          | 11                          | 34.47 ± 10.83        | a,b            | 25.19 ± 5.87         | a,b,c                | 6.43 ± 1.66         | a,b,c,d | 0.96 ± 0.63           | a,b            | 0.17 ± 0.04        | a,b                       | 67.23 ± 16.70         | a,b   |                           |                |       |                      |                |       |
| Sagrantino         | 10                          | 123.40 ± 34.02       | e              | 42.65 ± 21.65        | c,d                  | 16.91 ± 5.45        | e,f     | 3.77 ± 1.29           | d              | 0.32 ± 0.17        | b                         | 187.06 ± 58.59        | d     |                           |                |       |                      |                |       |
| Montepulciano      | 9                           | 52.25 ± 13.19        | a,b,c          | 27.93 ± 8.63         | a,b,c,d              | 11.52 ± 3.82        | c,d,e   | 2.45 ± 0.71           | b,c,d          | 0.17 ± 0.04        | a,b                       | 94.33 ± 22.93         | a,b,c |                           |                |       |                      |                |       |
| Corvina            | 7                           | 25.50 ± 12.24        | a              | 9.54 ± 7.67          | a                    | 3.42 ± 1.48         | a       | 0.58 ± 0.39           | a              | 0.15 ± 0.02        | a                         | 39.19 ± 20.76         | a     |                           |                |       |                      |                |       |
| <b>Total</b>       | <b>111</b>                  | <b>60.42 ± 31.70</b> |                | <b>30.35 ± 17.29</b> |                      | <b>10.14 ± 5.34</b> |         | <b>2.14 ± 1.27</b>    |                | <b>0.20 ± 0.11</b> |                           | <b>103.26 ± 49.50</b> |       |                           |                |       |                      |                |       |

Anova: Means that do not share a letter are significantly different (significance value below 0.05)

**Table S5.** Basic statistics and Anova analysis of the terminal units' % values

| Group (Cultivar)   | Number of samples per group | catechin terminal % |                |         | epicatechin terminal % |                |       | galocatechin terminal % |                |       | epigallocatechin terminal % |                |       | catechin gallate terminal % |                |       |
|--------------------|-----------------------------|---------------------|----------------|---------|------------------------|----------------|-------|-------------------------|----------------|-------|-----------------------------|----------------|-------|-----------------------------|----------------|-------|
|                    |                             | terminal monomers % | Std. Deviation | Anova   | terminal unit %        | Std. Deviation | Anova | terminal unit %         | Std. Deviation | Anova | terminal unit %             | Std. Deviation | Anova | terminal unit %             | Std. Deviation | Anova |
| Sangiovese Romagna | 7                           | 48.87               | ± 5.48         | a,b     | 33.08                  | ± 5.71         | d,e   | 14.69                   | ± 2.64         | b,c   | 3.12                        | ± 1.02         | b,c   | 0.24                        | ± 0.05         | b     |
| Sangiovese Tuscany | 12                          | 52.08               | ± 4.73         | a       | 31.65                  | ± 5.23         | d,e   | 13.33                   | ± 2.23         | c     | 2.72                        | ± 0.66         | c     | 0.21                        | ± 0.09         | b     |
| Nebbiolo           | 11                          | 60.41               | ± 4.16         | c,d,e   | 26.91                  | ± 6.78         | b,c,d | 10.90                   | ± 3.36         | b,c   | 1.58                        | ± 0.76         | a,b   | 0.20                        | ± 0.11         | b     |
| Aglianico          | 10                          | 55.07               | ± 5.59         | a,b,c   | 38.20                  | ± 4.73         | e     | 4.32                    | ± 0.95         | a     | 2.26                        | ± 1.55         | a,b,c | 0.15                        | ± 0.07         | b     |
| Nerello Mascalese  | 3                           | 58.36               | ± 2.06         | b,c,d   | 16.49                  | ± 6.13         | a     | 22.01                   | ± 7.27         | e     | 2.98                        | ± 0.60         | c     | 0.16                        | ± 0.04         | b     |
| Primitivo          | 11                          | 55.88               | ± 2.93         | a,b,c,d | 38.13                  | ± 2.95         | e     | 4.31                    | ± 1.14         | a     | 1.54                        | ± 0.67         | a,b   | 0.14                        | ± 0.08         | b     |
| Raboso Piave       | 10                          | 66.32               | ± 5.78         | e       | 18.06                  | ± 7.29         | a,b   | 13.14                   | ± 3.18         | b,c   | 2.24                        | ± 0.68         | a,b,c | 0.24                        | ± 0.14         | b     |
| Canonnau           | 9                           | 63.39               | ± 5.50         | d,e     | 19.60                  | ± 4.28         | a,b   | 14.87                   | ± 5.89         | c     | 1.89                        | ± 0.61         | a,b,c | 0.26                        | ± 0.18         | b     |
| Teroldego          | 11                          | 50.26               | ± 7.01         | a       | 38.43                  | ± 7.45         | e     | 9.68                    | ± 1.80         | b     | 1.36                        | ± 0.74         | a     | 0.27                        | ± 0.09         | b     |
| Sagrantino         | 10                          | 66.90               | ± 4.51         | e       | 21.68                  | ± 5.78         | a,b,c | 9.21                    | ± 2.00         | b     | 2.05                        | ± 0.59         | a,b,c | 0.17                        | ± 0.06         | b     |
| Montepulciano      | 9                           | 55.30               | ± 3.69         | a,b,c   | 29.54                  | ± 4.78         | c,d,e | 12.34                   | ± 2.90         | b,c   | 2.63                        | ± 0.61         | a,b,c | 0.19                        | ± 0.05         | b     |
| Corvina            | 7                           | 67.03               | ± 6.72         | e       | 21.26                  | ± 7.94         | a,b,c | 9.72                    | ± 3.31         | b     | 1.49                        | ± 0.73         | a,b   | 0.50                        | ± 0.29         | a     |
| <b>Total</b>       | 111                         | 58.23               | ± 7.93         |         | 28.75                  | ± 9.45         |       | 10.71                   | ± 4.90         |       | 2.09                        | ± 0.95         |       | 0.22                        | ± 0.14         |       |

Anova: Means that do not share a letter are significantly different (significance value below 0.05)

**Table S6.** Basic statistics and Anova analysis of the upper units' absolute values

| Group (Cultivar)   | Number of samples per group | epicatechin-PhI |                |       | epigallocatechin-PhI |                |       | epicatechin gallate-PhI |                |       | total upper units |                |       |
|--------------------|-----------------------------|-----------------|----------------|-------|----------------------|----------------|-------|-------------------------|----------------|-------|-------------------|----------------|-------|
|                    |                             | mg/L            | Std. Deviation | Anova | mg/L                 | Std. Deviation | Anova | mg/L                    | Std. Deviation | Anova | mg/L              | Std. Deviation | Anova |
| Sangiovese Romagna | 7                           | 946.64          | ± 164.34       | a,b   | 453.17               | ± 77.92        | c,d   | 117.61                  | ± 39.63        | b,c   | 1517.41           | ± 273.37       | b,c   |
| Sangiovese Tuscany | 12                          | 972.01          | ± 196.03       | a,b   | 454.42               | ± 102.39       | c,d   | 135.71                  | ± 51.13        | b,c   | 1562.13           | ± 340.08       | b,c   |
| Nebbiolo           | 11                          | 1387.48         | ± 277.46       | d     | 503.09               | ± 131.62       | c,d   | 178.95                  | ± 58.39        | c     | 2069.51           | ± 453.97       | c,d   |
| Aglianico          | 10                          | 1210.01         | ± 246.26       | c,d   | 204.31               | ± 72.54        | a,b   | 133.93                  | ± 49.24        | b,c   | 1548.24           | ± 346.47       | b,c   |
| Nerello Mascalese  | 3                           | 899.88          | ± 110.66       | a,b   | 534.90               | ± 54.72        | d     | 78.01                   | ± 7.99         | a,b   | 1512.79           | ± 171.37       | b,c   |
| Primitivo          | 11                          | 972.32          | ± 172.73       | a,b   | 188.47               | ± 54.40        | a,b   | 90.73                   | ± 26.62        | a,b   | 1251.52           | ± 229.41       | b     |
| Raboso Piave       | 10                          | 879.04          | ± 357.78       | a,b   | 356.93               | ± 178.87       | b,c   | 107.87                  | ± 76.76        | b,c   | 1343.84           | ± 607.13       | b     |
| Canonnau           | 9                           | 892.96          | ± 379.34       | a,b   | 290.51               | ± 126.24       | b     | 88.09                   | ± 62.10        | a,b   | 1271.55           | ± 560.06       | b     |
| Teroldego          | 11                          | 659.63          | ± 155.67       | b     | 281.65               | ± 87.20        | b     | 76.33                   | ± 24.92        | a,b   | 1017.62           | ± 251.72       | b     |
| Sagrantino         | 10                          | 1805.28         | ± 343.94       | e     | 491.48               | ± 128.68       | c,d   | 268.44                  | ± 88.37        | d     | 2565.20           | ± 547.39       | d     |
| Montepulciano      | 9                           | 739.34          | ± 236.14       | b     | 250.92               | ± 107.45       | b     | 89.62                   | ± 56.00        | a,b   | 1079.87           | ± 386.52       | b     |
| Corvina            | 7                           | 299.18          | ± 176.04       | a     | 68.62                | ± 44.94        | a     | 15.99                   | ± 15.83        | a     | 383.79            | ± 235.34       | a     |
| <b>Total</b>       | 111                         | 993.75          | ± 437.68       |       | 332.87               | ± 169.46       |       | 120.03                  | ± 79.26        |       | 1446.65           | ± 646.78       |       |

Anova: Means that do not share a letter are significantly different (significance value below 0.05)

**Table S7.** Basic statistics and Anova analysis of the upper units' % values

| Group (Cultivar)   | Number of samples per group | epicatechin-PhI % |          |                |       | epigallocatechin-PhI % |          |                |         | epicatechin gallate-PhI % |          |                |       |
|--------------------|-----------------------------|-------------------|----------|----------------|-------|------------------------|----------|----------------|---------|---------------------------|----------|----------------|-------|
|                    |                             | Upper unit %      | ±        | Std. Deviation | Anova | Upper unit %           | ±        | Std. Deviation | Anova   | Upper unit %              | ±        | Std. Deviation | Anova |
| Sangiovese Romagna | 7                           | 62.48             | ±        | 1.93           | a,b   | 29.94                  | ±        | 2.12           | f,g     | 7.59                      | ±        | 1.13           | c,d   |
| Sangiovese Tuscany | 12                          | 62.43             | ±        | 2.37           | a,b   | 29.12                  | ±        | 2.05           | g       | 8.45                      | ±        | 1.47           | b,c,d |
| Nebbiolo           | 11                          | 67.38             | ±        | 2.32           | c,d   | 24.11                  | ±        | 1.79           | d,e     | 8.51                      | ±        | 1.33           | c,d   |
| Aglianico          | 10                          | 78.51             | ±        | 2.98           | e     | 12.97                  | ±        | 2.80           | a       | 8.52                      | ±        | 1.87           | c,d   |
| Nerello Mascalese  | 3                           | 59.44             | ±        | 1.00           | a     | 35.40                  | ±        | 0.79           | h       | 5.16                      | ±        | 0.21           | a,b   |
| Primitivo          | 11                          | 77.89             | ±        | 3.11           | e     | 14.99                  | ±        | 2.96           | a,b     | 7.12                      | ±        | 1.23           | b,c   |
| Raboso Piave       | 10                          | 66.84             | ±        | 4.09           | c,d   | 25.80                  | ±        | 3.42           | d,e,f,g | 7.36                      | ±        | 2.03           | b,c   |
| Canonnau           | 9                           | 70.62             | ±        | 2.17           | d     | 22.98                  | ±        | 2.21           | d       | 6.40                      | ±        | 1.74           | b,c   |
| Teroldego          | 11                          | 65.21             | ±        | 3.42           | b,c   | 27.27                  | ±        | 3.82           | e,f,g   | 7.52                      | ±        | 1.38           | b,c,d |
| Sagrantino         | 10                          | 70.78             | ±        | 2.69           | d     | 18.99                  | ±        | 1.84           | c       | 10.23                     | ±        | 1.71           | d     |
| Montepulciano      | 9                           | 69.24             | ±        | 3.82           | c,d   | 23.05                  | ±        | 3.40           | d       | 7.70                      | ±        | 2.85           | b,c,d |
| Corvina            | 7                           | 78.82             | ±        | 2.62           | e     | 17.53                  | ±        | 2.36           | b,c     | 3.65                      | ±        | 1.31           | a     |
| <b>Total</b>       | <b>111</b>                  | <b>69.58</b>      | <b>±</b> | <b>6.50</b>    |       | <b>22.84</b>           | <b>±</b> | <b>6.28</b>    |         | <b>7.58</b>               | <b>±</b> | <b>2.20</b>    |       |

Anova: Means that do not share a letter are significantly different (significance value below 0.05)

### Formulas for the calculations

#### From the Table S3

- **Free catechin + epicatechin %** = “catechin free %” + “epicatechin free %”
- **Free C-ring *trans/cis*** = (“catechin free %” + “gallocatechin free %”)/ (“epicatechin free %” + “epigallocatechin free %”)
- **Free B-ring 3xOH/2xOH** = (“gallocatechin free %” + “epigallocatechin free %”)/ (“catechin free %” + “epicatechin free %”)
- **Free galloylated %** = “catechin gallate free %”

#### From the Table S5

- **Terminal C-ring *trans/cis*** = (“catechin terminal %” + “gallocatechin terminal %”)/ (“epicatechin terminal %” + “epigallocatechin terminal %”)
- **Terminal B-ring 3xOH/2xOH** = (“gallocatechin terminal %” + “epigallocatechin terminal %”)/ (“catechin terminal %” + “epicatechin terminal %”)
- **Terminal galloylated %** = “catechin gallate terminal %”

#### From the Table S7

- **Upper galloylated %** = “epicatechin gallate-PhI %”

For the formulas were used information about the biosynthesis and the chemistry of the flavan-3-ols [1-4], and previous similar studies [5-12].

#### Literature

1. Ribereau-Gayon, P.; Maujean, A.; Glories, Y.; Dubourdieu, Denis.; Donèche, B.; Lonvaud, A. Handbook of Enology, 2 Volume Set.; John Wiley, 2006; ISBN 0470010371.
2. Flamini, R.; Mattivi, F.; de Rosso, M.; Arapitsas, P.; Bavaresco, L. Advanced Knowledge of Three Important Classes of Grape Phenolics: Anthocyanins, Stilbenes and Flavonols. Int J Mol Sci 2013, 14, 19651–19669, doi:10.3390/ijms141019651.
3. Waterhouse, A.L.; Sacks, G.L.; Jeffery, D.W. Understanding Wine Chemistry. 2016, 179–193, doi:10.1002/9781118730720.
4. Rousserie, P.; Rabot, A.; Geny-Denis, L. From Flavanols Biosynthesis to Wine Tannins: What Place for Grape Seeds? J Agric Food Chem 2019, 67, 1325–1343, doi:10.1021/ACS.JAFC.8B05768/ASSET/IMAGES/MEDIUM/JF-2018-05768M\_0011.GIF.
5. Arapitsas, P.; Perenzoni, D.; Guella, G.; Mattivi, F. Improving the Phloroglucinolysis Protocol and Characterization of Sagrantino Wines Proanthocyanidins. Molecules 2021, Vol. 26, Page 1087 2021, 26, 1087, doi:10.3390/MOLECULES26041087.
6. Seddon, T.J.; Downey, M.O. Comparison of Analytical Methods for the Determination of Condensed Tannins in Grape Skin. Aust J Grape Wine Res 2008, 14, 54–61, doi:10.1111/j.1755-0238.2008.00007.x.
7. Downey, M.O.; Harvey, J.S.; Robinson, S.P. Analysis of Tannins in Seeds and Skins of Shiraz Grapes throughout Berry Development. Aust J Grape Wine Res 2003, 9, 15–27, doi:10.1111/j.1755-0238.2003.tb00228.x.

8. Mattivi, F.; Vrhovsek, U.; Masuero, D.; Trainotti, D. Differences in the Amount and Structure of Extractable Skin and Seed Tannins amongst Red Grape Varieties. *Aust J Grape Wine Res* 2009, 15, 27–35, doi:10.1111/j.1755-0238.2008.00027.x.
9. Pinasseau, L.; Verbaere, A.; Roques, M.; Meudec, E.; Vallverdú-Queralt, A.; Terrier, N.; Boulet, J.-C.; Cheynier, V.; Sommerer, N.; Pinasseau, L.; et al. A Fast and Robust UHPLC-MRM-MS Method to Characterize and Quantify Grape Skin Tannins after Chemical Depolymerization. *Molecules* 2016, 21, 1409, doi:10.3390/molecules21101409.
10. Chira, K.; Lorrain, B.; Ky, I.; Teissedre, P.-L. Tannin Composition of Cabernet-Sauvignon and Merlot Grapes from the Bordeaux Area for Different Vintages (2006 to 2009) and Comparison to Tannin Profile of Five 2009 Vintage Mediterranean Grapes Varieties. *Molecules* 2011, 16, 1519–1532, doi:10.3390/molecules16021519.
11. Chira, K.; Pacella, N.; Jourdes, M.; Teissedre, P.-L. Chemical and Sensory Evaluation of Bordeaux Wines (Cabernet-Sauvignon and Merlot) and Correlation with Wine Age. *Food Chem* 2011, 126, 1971–1977, doi:10.1016/J.FOODCHEM.2010.12.056.
12. Vidal, S.; Francis, L.; Guyot, S.; Marnet, N.; Kwiatkowski, M.; Gawel, R.; Cheynier, V.; Waters, E.J. The Mouth-Feel Properties of Grape and Apple Proanthocyanidins in a Wine-like Medium. *J Sci Food Agric* 2003, 83, 564–573, doi:https://doi.org/10.1002/jsfa.1394.
